# Supplementary material for: Molecular cloning, expression, and characterization of acyltransferase from Pseudomonas protegens
Source: Appl Microbiol Biotechnol. 2018 May 12;102(14):6057–68. doi: 10.1007/s00253-018-9052-z (PMC6013524; doi:10.1007/s00253-018-9052-z)
Supplement: Supplementary file 1 — (PDF 1431 kb) [file 253_2018_9052_MOESM1_ESM.pdf]

# Applied Microbiology and Biotechnology

## Supplementary materials

### **Molecular cloning, expression and characterization of acyltransferase from *Pseudomonas protegens***

Nina G. Schmidt,<sup>1,2</sup> Anna Źądło-Dobrowolska,<sup>2</sup> Valerie Ruppert,<sup>2</sup> Christian Höflehner,<sup>2</sup> Birgit Wilschi,<sup>1</sup> Wolfgang Kroutil\*<sup>1,2</sup>

<sup>1</sup>ACIB GmbH, Graz, Austria

<sup>2</sup>Institute of Chemistry, University of Graz, NAWI Graz, BioTechMed Graz, Graz, Austria

\*Corresponding Author: wolfgang.kroutil@uni-graz.at;

Tel.: +43/(0)316/380-5350; Fax.: +43/(0)316/380-9840

# Supporting Information

## Table of Contents

|                                                                                 |    |
|---------------------------------------------------------------------------------|----|
| 1. Screening of <i>Pseudomonas</i> wildtype strains .....                       | 3  |
| 2. Plasmid construction of recombinant ATases .....                             | 4  |
| 2.1. Protein sequence-alignment of PhlA, PhlC and PhlB .....                    | 5  |
| 2.2. Cloning of <i>Pb</i> ATaseWT (pEG330) and <i>Pp</i> ATaseWT (pEG331) ..... | 8  |
| 2.3. Cloning of <i>Pp</i> ATaseCH (pEG332) .....                                | 9  |
| 2.4. Cloning of <i>Pp</i> ATaseCH (pCAS1) .....                                 | 14 |
| 3. SDS-PAGE analysis .....                                                      | 15 |
| 4. Alternative ATase Preparations and Storage Types .....                       | 15 |
| 5. Modified procedure to test the impact of bivalent metals .....               | 16 |
| 6. Modified procedure to test the impact of inhibitors/additives .....          | 18 |
| 7. Synthesis of 2,4-diacetylphloroglucinol (DAPG, 5) .....                      | 18 |
| References .....                                                                | 18 |

## 1. Screening of *Pseudomonas* wildtype strains

32 strains from the in-house culture collection (Table S1) were tested for their ability to catalyze a reversible acetylation and deacetylation of MAPG (Figure S1).

**Table S1.** *Pseudomonas* strains investigated.

| Entry | Strain                               | Designation  |
|-------|--------------------------------------|--------------|
| 1     | <i>Pseudomonas acidovorans</i>       | ATCC 17438   |
| 2     | <i>Pseudomonas aureofaciens</i>      | ATCC 43051   |
| 3     | <i>Pseudomonas brassicacearum</i>    | DSM 13227    |
| 4     | <i>Pseudomonas chlororaphis</i>      | ATCC 9447    |
| 5     | <i>Pseudomonas cichorii</i>          | DSM 50259    |
| 6     | <i>Pseudomonas dehalogenans</i> R    | FCC 162      |
| 7     | <i>Pseudomonas elodea</i>            | ATCC 31461   |
| 8     | <i>Pseudomonas fluorescens</i>       | DSM 50106    |
| 9     | <i>Pseudomonas fluorescens</i>       | ATCC 17571   |
| 10    | <i>Pseudomonas fluorescens</i>       | ATCC 49838   |
| 11    | <i>Pseudomonas fluorescens</i>       | NRRL B 00010 |
| 12    | <i>Pseudomonas fluorescens</i> Pf-5  | ATCC BAA-477 |
| 13    | <i>Pseudomonas fragi</i>             | DSM 3456     |
| 14    | <i>Pseudomonas marginalis</i>        | FCC 177      |
| 15    | <i>Pseudomonas mephitica</i>         | FCC 178      |
| 16    | <i>Pseudomonas oleovorans</i>        | ATCC 29347   |
| 17    | <i>Pseudomonas ovalis</i>            | ATCC 00950   |
| 18    | <i>Pseudomonas pavonacea</i>         | NRRL B 00969 |
| 19    | <i>Pseudomonas protegens</i>         | DSM 19095    |
| 20    | <i>Pseudomonas pseudoalcaligenes</i> | DSM 10086    |
| 21    | <i>Pseudomonas putida</i>            | FCC 145      |
| 22    | <i>Pseudomonas putida</i>            | ATCC 17453   |
| 23    | <i>Pseudomonas putida</i>            | ATCC 47054   |
| 24    | <i>Pseudomonas putida</i>            | DSM 12264    |
| 25    | <i>Pseudomonas rhodesiae</i>         | FCC 179      |
| 26    | <i>Pseudomonas</i> sp.               | DSM 6978     |
| 27    | <i>Pseudomonas</i> sp.               | DSM 12877    |
| 28    | <i>Pseudomonas</i> sp.               | NCIMB 11753  |
| 29    | <i>Pseudomonas stutzeri</i>          | DSM 17083    |
| 30    | <i>Pseudomonas syringae</i>          | DSM 50272    |
| 31    | <i>Pseudomonas syringae</i>          | DSM 1241     |
| 32    | <i>Pseudomonas thermotolerans</i>    | DSM 14292    |

Conditions: Lyophilized cells of the respective *Pseudomonas* strain (20 mg), KPi-buffer (50 mM, pH 7.5), MAPG (50 mM, forward reaction) or alternatively PG and DAPG (50 mM, reverse reaction), 3 h, 30 °C and 500 rpm.

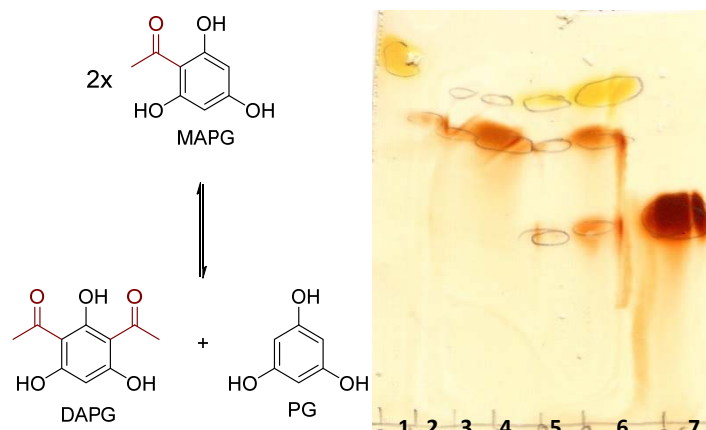

**Figure S1.** TLC of the extracted products of the forward reaction after staining with cinnamaldehyde\*HCl. References: DAPG (5, lane 1), MAPG (6, lane 2), PG (7, lane 7). Reactions (50 mM, 6): *P. protegens* DSM19095 (lane 3-4); *P. brassicacearum* DSM13227 (lane 5-6).

## 2. Plasmid construction of recombinant ATases

Primer sequences and plasmids used in this study are listed in Table S2. To construct the expression constructs *PpATaseWT* and *PbATaseWT*, the genomic DNA of the respective *Pseudomonas* wild-type served as template to amplify the ATase-encoding operon *phlACB* by PCR. The PCR products were digested (*KpnI/BamHI*), purified and ligated into target vector pASK-Iba3plus. The obtained expression vectors carry the ATase encoding genes *phlACB* under the control of the  $P_{Tet}$  promoter. To construct the recombinant *PpATaseCH* with the optimized sequence, the ATase encoding open-reading frames *phlA*, *phlC* and *phlB* of *P. protegens* were codon-optimized by manually matching the codon-frequency of the *Pseudomonas* wild-type with *E. coli*. To achieve this goal, codon-usage tables for *Escherichia coli* B and *Pseudomonas fluorescens* were obtained from the Kazusa-database (<http://www.kazusa.or.jp/codon/>). Ribosomal binding sites suitable for *E. coli* were introduced upstream of each start codon of each *phl* gene. The optimized *phl* genes were purchased as gene fragments (gBlocks©) and assembled with the double-digested pASKIBA3plus backbone (*EcoRI/HindIII*) by overlap extension-PCR (OE-PCR) and subsequent Gibson cloning (Gibson Assembly® master mix). The final expression vector carried the *E. coli* codon-optimized ATase encoding genes *phlACB* under the control of the  $P_{Tet}$  promoter.

**Table S2.** Plasmids and primers employed in this study. Mutagenized codons are shown in bold, restriction site are underlined. Ribosomal binding sites are shown in lowercase letters.

| Plasmids                           | Origin (GenBankID)      | Description/Comments                                                                                                                                                                                                                 |
|------------------------------------|-------------------------|--------------------------------------------------------------------------------------------------------------------------------------------------------------------------------------------------------------------------------------|
| pASKIBA3plus                       | IBA-Lifescience         | <i>P<sub>Tet</sub></i> , <i>Amp<sup>r</sup></i> , <i>ColE1<sub>ori</sub></i> , C-terminal StrepTag                                                                                                                                   |
| pEG331                             | this study (CP003190.1) | Wild-type-derived <i>phlACB</i> genes of <i>P. protegens</i> DSM19095, isolated from genomic DNA by PCR; PCR primers: <i>PpWT-Fow/Rev</i> .                                                                                          |
| pEG330                             | this study (KY173354)   | Wild-type-derived <i>phlACB</i> genes of <i>P. brassicacearum</i> DSM13227, isolated from genomic DNA by PCR; PCR primers: <i>PbWT-Fow/Rev</i>                                                                                       |
| pEG332                             | this study (KY173355)   | Codon-optimized gene fragments <i>phlA</i> , <i>phlC</i> and <i>phlB</i> based on <i>phlACB</i> from <i>P. protegens</i> DSM19095, assembled by Gibson cloning and overlap-extension PCR. PCR primers: <i>OE1-4ATaseCH-Fow/Rev</i> . |
| Primers                            | Origin                  | Sequence (5'→3')                                                                                                                                                                                                                     |
| <i>PpWT-Fow</i>                    | Eurofins                | ATATAGGTACCATGAACGTGAAAAAGATAGGTATTG                                                                                                                                                                                                 |
| <i>PpWT-Rev</i>                    | Eurofins                | ATATAGGATCCTTATATATCGAGTACGAACCTATAAG                                                                                                                                                                                                |
| <i>PbWT-Fow</i>                    | Eurofins                | ATATAGGTACCATGAATAAAGTAGGAATTGTG                                                                                                                                                                                                     |
| <i>PbWT-Rev</i>                    | Eurofins                | ATATAGGATCCTTATTTACACAGTACAACTTATAG                                                                                                                                                                                                  |
| <i>OE1ATaseCH-Fow</i>              | IDT                     | ATATAAGAAATTCaaggagatatacataTGATGAATGTGAAGAAAATAGGT                                                                                                                                                                                  |
|                                    |                         | ATCGTTAGC                                                                                                                                                                                                                            |
| <i>OE2ATaseCH-Fow</i>              | IDT                     | CGCTGACCGCGTACCTCTAAGGTACCaaggagatatacataTGATGTGCGC                                                                                                                                                                                  |
|                                    |                         | ACGTCGCG                                                                                                                                                                                                                             |
| <i>OE3ATaseCH-Rev</i>              | IDT                     | TGCGCACATCAtatgtatatctcttGGTACCTTAGAGGTACGCGGTCAGCG                                                                                                                                                                                  |
|                                    |                         | CATAATC                                                                                                                                                                                                                              |
| <i>OE4ATaseCH-Rev</i>              | IDT                     | ATATATGAATTCGCCGAGACGGCCATG                                                                                                                                                                                                          |
| Bacterial Strains                  | Origin (Strain ID)      | GenBankID ( <i>phlACB</i> gene locus)/comments                                                                                                                                                                                       |
| <i>Pseudomonas brassicacearum</i>  | DSMZ (DSM13227)         | LT629713.1 (bp: 1051432-1054193) / <i>phlACB</i> from <i>P. brassicacearum</i> BS3663 are 100% to <i>phlACB</i> from <i>P. brassicacearum</i> DSM13227                                                                               |
| <i>Pseudomonas protegens</i>       | DSMZ (DSM19095)         | CP003190.1 (bp: 6560049-6562816) / other designation: CHA0                                                                                                                                                                           |
| <i>Pseudomonas fluorescens</i> Pf5 | ATCC (ATCC BAA-477)     | CP000076.1 (bp: 6766435-6769202)                                                                                                                                                                                                     |

## 2.1. Protein sequence-alignment of PhlA, PhlC and PhlB

The *phlACB* operon from *P. protegens* DSM19095 and *P. brassicacearum* DSM13227 was amplified from the genomic DNA using primer sequences which were identified in a BLAST-search (Table S3).

**Table S3.** BLAST-search results.

| Entry | Organism                        | Description                                                        | GenBank accession no. | Seq. identity [%] |
|-------|---------------------------------|--------------------------------------------------------------------|-----------------------|-------------------|
| 1     | <i>Pseudomonas</i> sp. YGJ3     | <i>phlACBDEFGHI</i> complete cds                                   | AB636682.1            | 100               |
| 2     | <i>P. protegens</i> CHA0        | complete genome                                                    | CP003190.1            | 99                |
| 3     | <i>P. brassicacearum</i> NFM241 | complete genome                                                    | CP002585.1            | 80                |
| 4     | <i>P. fluorescens</i> J2        | <i>phlA</i> , <i>phlB</i> , <i>phlC</i> , <i>phlD</i> complete cds | JN561597.1            | 80                |

Multiple sequence alignments of the *Phl*-subunits were performed using the T-COFFEE multiple sequence alignment program provided by EMBL-EBI.[1] *PhlA*, *PhlC* and *PhlB* originating from *P. protegens* (*Pp*), *P. brassicacearum* (*Pb*) and *P. fluorescens* Pf-5 (*Pf5*) were aligned to the *Phl*-subunits of *Pseudomonas* sp. YGJ3. The rendering of the sequence alignments was performed with ESPrpt 3.0 (<http://esprpt.ibcp.fr>).[2] The secondary structure elements of individual *Phl*-subunits from *P. protegens*, as present in the crystal structure, are depicted above the alignments (Figure S2-S4).

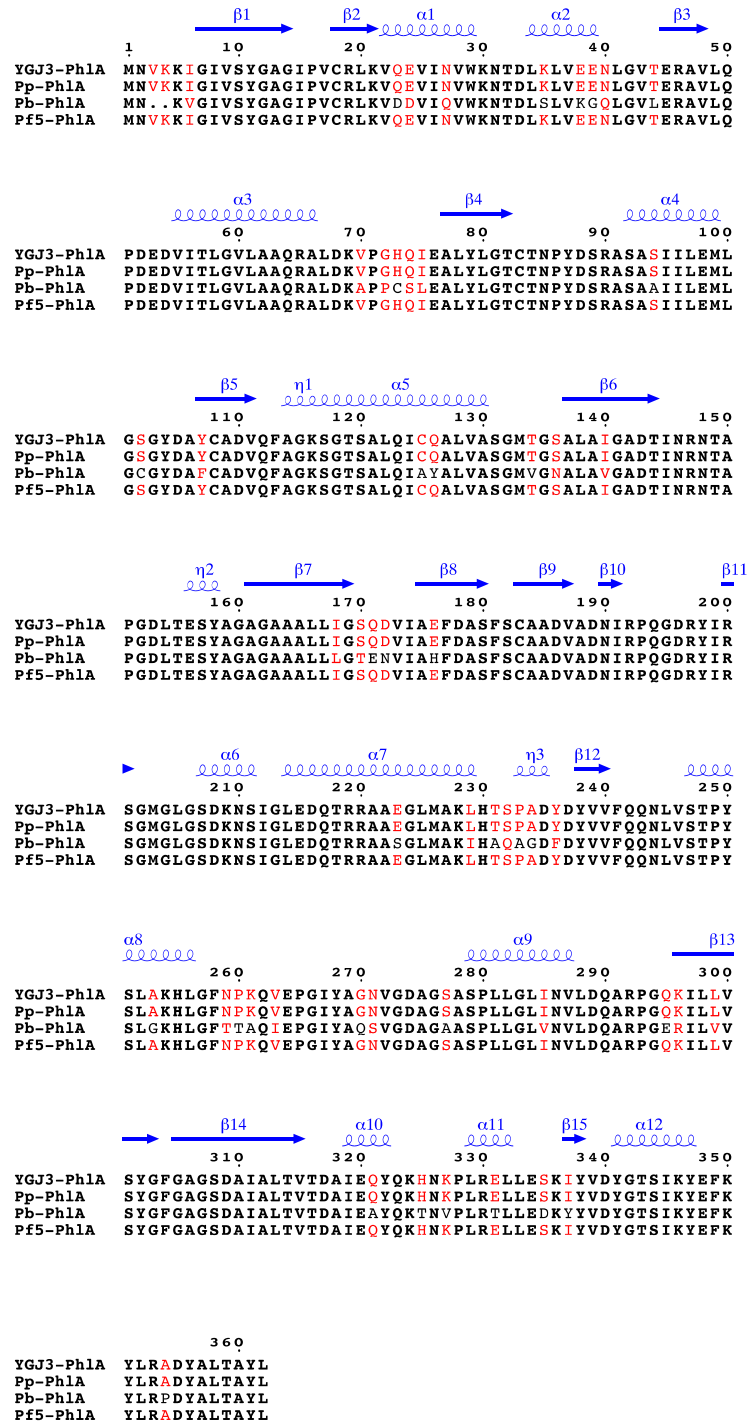

**Figure S2.** Protein sequence alignment of PhlA. Sequences of PhlA from *P. protegens* (Pp), *P. brassicacearum* (Pb) and *P. fluorescens* (Pf5) were aligned to *Pseudomonas* sp. YGJ3.

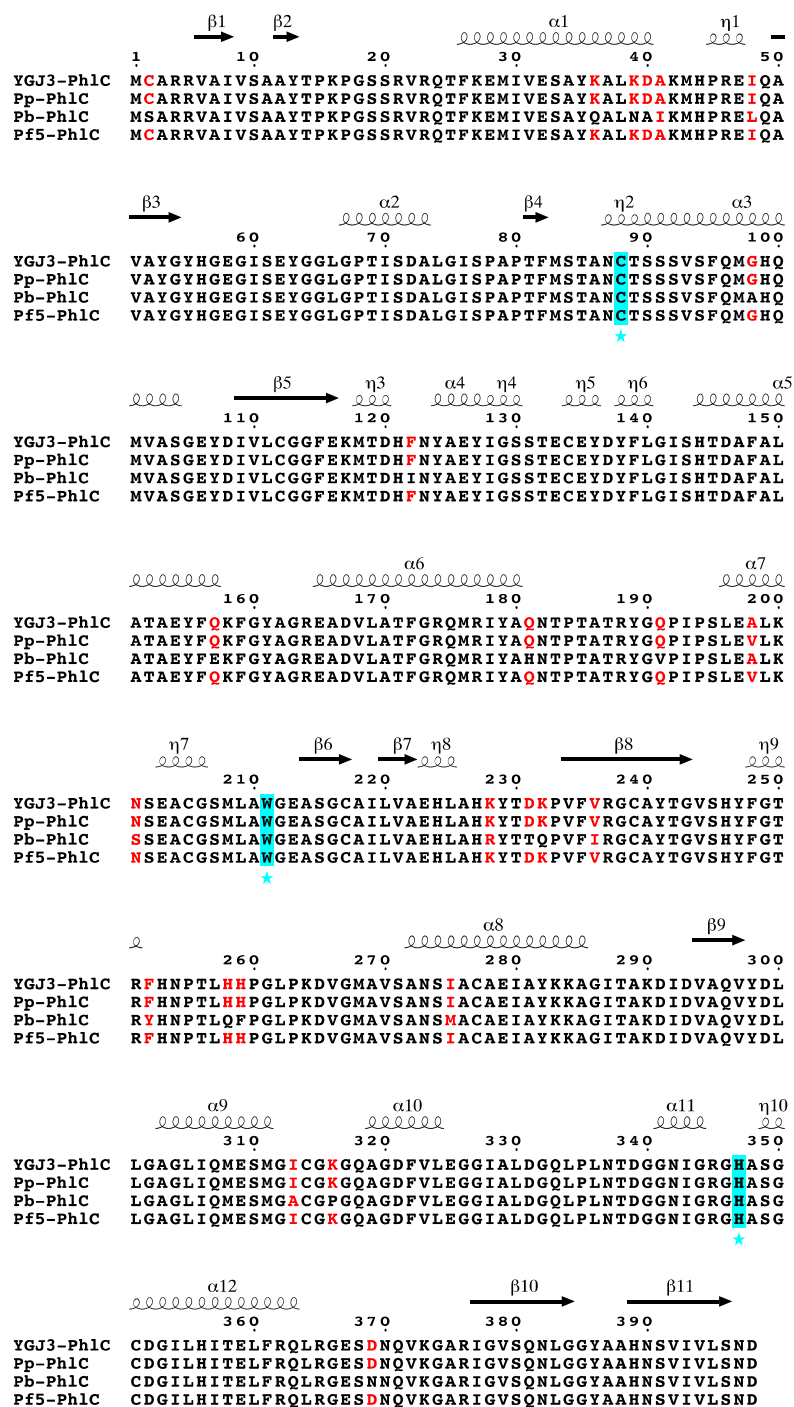

**Figure S3.** Protein sequence alignment of *PhlC*. Sequences of *PhlC* from *P. protegens* (Pp), *P. brassicacearum* (Pb) and *P. fluorescens* (Pf-5) were aligned to *Pseudomonas* sp. YGJ3.

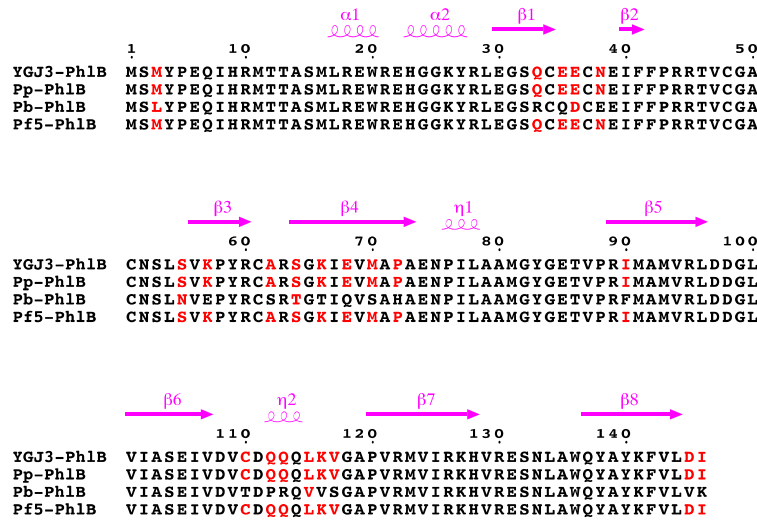

**Figure S4.** Protein sequence alignment of *PhlB*. Sequences of *PhlB* from *P. protegens* (Pp), *P. brassicacearum* (Pb) and *P. fluorescens* (Pf-5) were aligned to *Pseudomonas* sp. YGJ3.

## 2.2. Cloning of *PbATase*WT (pEG330) and *PpATase*WT (pEG331)

**PCR-amplification of the wild-type *phlACB* operon.** The ATase encoding *phlACB* operon (approx. 2770 bp) was amplified from the genomic DNA of *P. protegens* or *P. brassicacearum*. The genomic DNA was isolated according to the manufacture's protocol (PureLink® Genomic DNA Minikit, Thermo Fischer). The following primers were used (restriction site underlined):

*PbATase*-FW: 5'-ATATAGGTACCATGAATAAAGTAGGAATTGTG-3'

*PbATase*-REV: 5'-ATATAGGATCCTTATTTACACAGTACAACTTATAG-3'

*PpATase*-FW 5'-ATATAGGTACCATGAACGTGAAAAAGATAGGTATTG-3'

*PpATase*-REV 5'-ATATAGGATCCTTATATATCGAGTACGAACTTATAAG-3'

The PCR reaction mixture consisted of the following components:

- 26  $\mu$ L H<sub>2</sub>O sterile
- 10  $\mu$ L Phusion GC buffer (5 $\times$ )
- 1  $\mu$ L template (genomic DNA)
- 5  $\mu$ L primer forward (5 nmol  $\mu$ L<sup>-1</sup>)
- 5  $\mu$ L primer reverse (5 nmol  $\mu$ L<sup>-1</sup>)
- 1.5  $\mu$ L DMSO (3 vol%)
- 1  $\mu$ L dNTPs (0.2 nmol  $\mu$ L<sup>-1</sup>)
- 0.5  $\mu$ L Phusion DNA polymerase (2 U  $\mu$ L<sup>-1</sup>)

The following PCR program was used:

- 1 $\times$  98  $^{\circ}$ C 2:00 min

|     |   |       |          |
|-----|---|-------|----------|
| 25× | { | 98 °C | 0:20 min |
|     |   | 58 °C | 0:15 min |
|     |   | 72 °C | 2:00 min |
| 1×  |   | 72 °C | 3:00 min |
|     |   | 4 °C  | ∞        |

Column purification of the PCR-products was performed (Qiagen®-PCR purification kit). The approximate concentration of the PCR products was determined by agarose gel electrophoresis.

**Restriction and ligation.** The PCR products (0.2 µg) and the pASK-IBA3plus vector backbone (1 µg) were digested with *KpnI* and *BamHI* (FastDigest, Thermo Fischer). The DNA was gel-purified prior to ligation.

The ligation consisted of the following components:

|       |                          |
|-------|--------------------------|
| 12 µL | H <sub>2</sub> O sterile |
| 4 µL  | insert                   |
| 1 µL  | vector                   |
| 2 µL  | ligation buffer (10×     |
| 1 µL  | T4 ligase                |

The reaction was incubated overnight at 4 °C. 5 µL of the ligation mix was transformed into *E. coli* DH5α and streaked onto LB plates containing 100 µg mL<sup>-1</sup> ampicillin for selection. Isolated plasmids (QIAprep Spin Miniprep Kit, Qiagen®) of randomly picked clones were controlled by restriction digest and sequencing.

### 2.3. Cloning of *PpATaseCH* (pEG332)

The genes *phlA*, *phlC* and *phlB* originating from *P. protegens* were codon-harmonized by manually matching the codon-frequency of *Pseudomonas* to *E. coli*. Ribosomal binding sites (RBS) were introduced at the 5'-end of each *phl* gene. The optimized *phl*\* genes were ordered as gene strings (gBlocks®, IDT). Cloning of the gene strings into the pASK-IBA3plus expression vector was accomplished by Gibson assembly and overlap extension PCR (OExPCR).

**Gibson cloning.** A four-fragment Gibson assembly [5] between the pASK-IBA3plus vector (*EcoRI/BamHI* digested, gel-purified) and the gene strings, *phlA*\*, *phlC*\* and *phlB*\* was carried out (Figure S5 and Table S4) using the Gibson assembly master mix® (New England Biolabs).

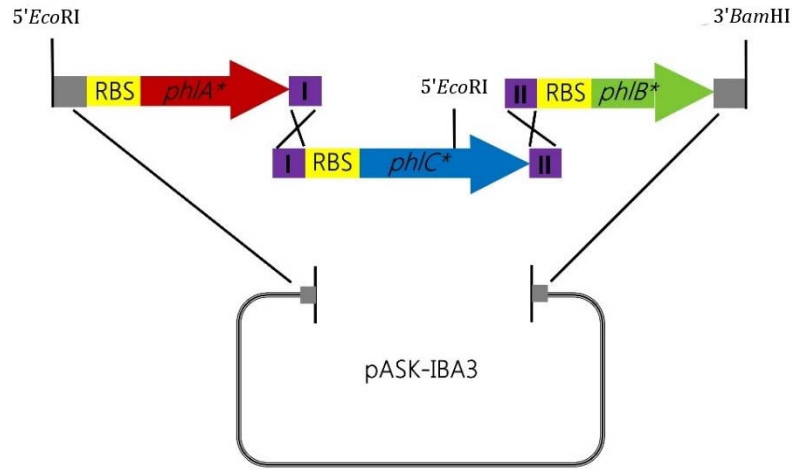

**Figure S5.** Cloning strategy. Four-fragment Gibson assembly of the optimized *phl*\* genes and the pASK-IBA3 backbone.

The following amounts were applied (Table S4):

**Table S4.** Calculations for the Gibson assembly sample preparation.

| Fragment             | Size (bp) | pmol  | Mass (ng) |
|----------------------|-----------|-------|-----------|
| pASK-IBA3plus vector | 3226      | 0.048 | 100       |
| <i>phlA</i> *        | 1238      | 0.048 | 38.4      |
| <i>phlC</i> *        | 1346      | 0.048 | 41.7      |
| <i>phlB</i> *        | 590       | 0.048 | 18.3      |

The assembly was performed according to the manufacture's protocol followed by direct transformation into *E. coli* DH5 $\alpha$ .

**Colony-PCR.** Gibson assembled clones were verified by colony-PCR using primers which flank the desired insert:

IBA3-FW: 5'-GAGTTATTTTACCACTCCCT-3'

IBA3-REV: 5'-CGCAGTAGCGGTAAACG-3'

The PCR reaction mixture consisted of the following components:

|              |                                                |
|--------------|------------------------------------------------|
| 7.5 $\mu$ L  | H <sub>2</sub> O sterile                       |
| 12.5 $\mu$ L | DreamTaq PCR-mastermix (2 $\times$ )           |
| 2.5 $\mu$ L  | primer forward (5 nmol $\mu$ L <sup>-1</sup> ) |
| 2.5 $\mu$ L  | primer reverse (5 nmol $\mu$ L <sup>-1</sup> ) |

The following PCR program was used:

|             |                 |          |
|-------------|-----------------|----------|
| 1 $\times$  | 95 $^{\circ}$ C | 3:00 min |
| 25 $\times$ | 94 $^{\circ}$ C | 0:30 min |
|             | 58 $^{\circ}$ C | 0:30 min |
|             | 72 $^{\circ}$ C | 2:50 min |
| 1 $\times$  | 72 $^{\circ}$ C | 5:00 min |
|             | 4 $^{\circ}$ C  | $\infty$ |

Selected clones were restreaked onto LB plates containing 100  $\mu\text{g mL}^{-1}$  ampicillin for selection and the isolated plasmids were sequenced. Misassembled DNA stretches within *phlA*\* and *phlC*\* of the Gibson assembled plasmid pEG332\_C20 (Figure S6, a) were corrected by OEx PCR to establish the correct *phlACB*\* construct (pEG332).

**OExPCR.** The OExPCR consisted of 3 steps: (i) extension PCR 1 & 2, (ii) overlap extension PCR, (iii) purification PCR [4] (Figure S6, b).

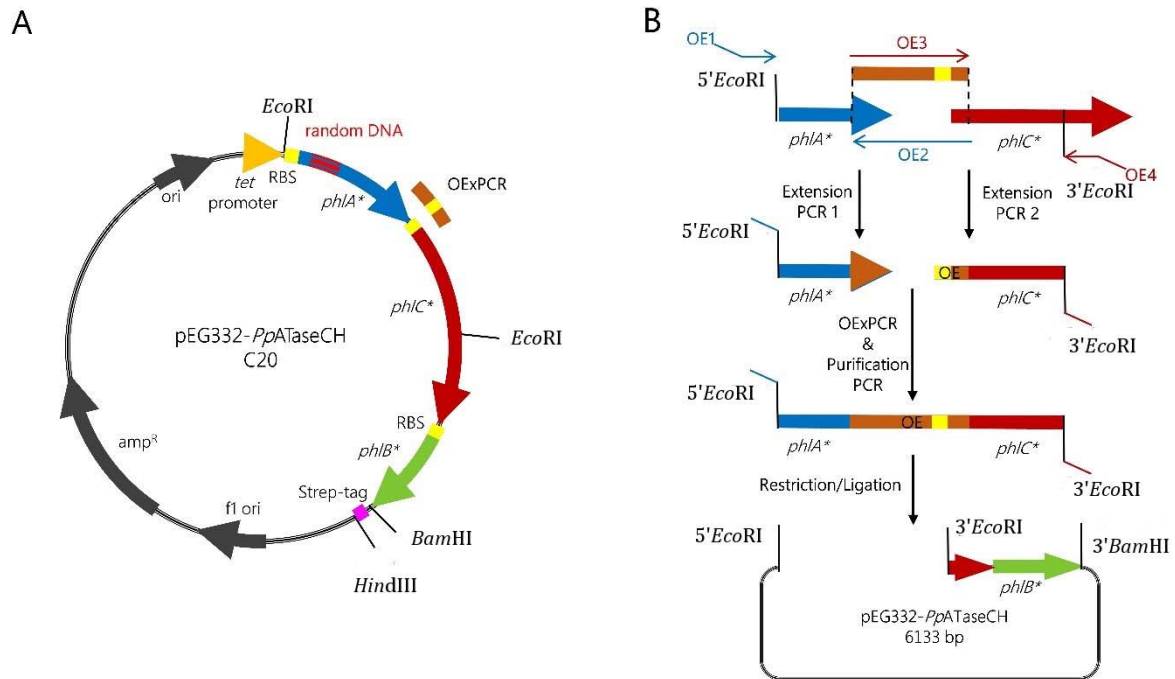

**Figure S6.** Cloning strategy to “repair” the defective pEG332\_C20 plasmid. **(a)** Defective pEG332\_C20 obtained via Gibson assembly containing random DNA stretches ( $\approx 100$  bp) within *phlA*\*. **(b)** Overview of the OExPCR to establish the correct *phlACB*\* construct (pEG332).

**(i) Extension PCR.** Areas of homology (OE-sequences) required for the subsequent overlap PCR were introduced to the flanking regions of the *phlA*\* and *phlC*\* gene strings. The following primers were used (restriction sites underlined; RBS small letters):

OE1ATaseCH-FW:

5’-ATATAGAATTCaaggagatatacataTGATGAATGTGAAGAAAATAGGTATCGTTAGC-3’

OE2ATaseCH-REV:

5’-CGCTGACCGCGTACCTCTAAGGTACCaaggagatatacataTGATGTGCGCACGTCGCG-3’

OE3ATaseCH-FW:

5’-TGCGCACATCAatgtatatctccttGGTACCTTAGAGGTACGCGGTCAGCGCATAATC-3’

OE4ATaseCH-REV:

5’-ATATATGAATTCGCCGAGACGGCCATG-3’

The PCR reaction mixture consisted of the following components:

25 µL H<sub>2</sub>O sterile  
 10 µL Phusion GC buffer (5×)  
 2.5 µL template (2.5 ng, *phlA*\* or *phlC*\* gene strings)  
 2.5 µL primer forward (5 nmol µL<sup>-1</sup>)  
 2.5 µL primer reverse (5 nmol µL<sup>-1</sup>)  
 1.5 µL DMSO (3 vol%)  
 5 µL dNTPs (0.2 nmol µL<sup>-1</sup>)  
 0.5 µL Phusion DNA polymerase (2 U µL<sup>-1</sup>)

The following PCR program was used:

|     |       |          |
|-----|-------|----------|
| 1×  | 95 °C | 0:45 min |
| 25× | 94 °C | 0:10 min |
|     | 60 °C | 0:20 min |
|     | 72 °C | 0:40 min |
| 1×  | 72 °C | 3:00 min |
|     | 4 °C  | ∞        |

The products of the extension PCR (*phlA*\*\_OE & *phlC*\*\_OE) were gel-purified, blunt-end ligated into pJET1.2 according to the manufacture's protocol (CloneJET-PCR Cloning Kit, Thermo Scientific) and transformed into *E. coli* DH5α. Isolated plasmids of selected clones were sent for sequencing.

**(ii) Overlap PCR.** The products of the extension PCR, *phlA*\*\_OE and *phlC*\*\_OE, were spliced together in a primerless overlap PCR yielding *phlAC*\*\_OE (15 cycles). The amounts of template DNA were calculated based on 10.0 ng of the biggest fragment using the following equation:

$$m_{\text{Insert\_small}} = \frac{m_{\text{insert\_big}}[\text{ng}] * \text{size}_{\text{insert\_small}}[\text{bp}]}{\text{size}_{\text{insert\_big}}[\text{bp}]}$$

The PCR reaction mixture consisted of the following components:

32.3 µL H<sub>2</sub>O sterile  
 10 µL Phusion GC buffer (5×)  
 1 µL template 1 (10 ng, *phlA*\*\_OE)  
 0.75 µL template 2 (7.5 ng, *phlC*\*\_OE)  
 1.5 µL DMSO (3 vol%)  
 4 µL dNTPs (0.2 nmol µL<sup>-1</sup>)  
 0.5 µL Phusion DNA polymerase (2 U µL<sup>-1</sup>)

The following PCR program was used:

|     |       |          |
|-----|-------|----------|
| 1×  | 98 °C | 0:30 min |
| 15× | 98 °C | 0:10 min |
|     | 60 °C | 0:20 min |
|     | 72 °C | 0:40 min |
| 1×  | 72 °C | 7:00 min |
|     | 4 °C  | ∞        |

**(iii) Purification PCR.** Flanking primers (OE1ATaseCH-FW & OE4ATaseCH, *vide supra*) were directly added to the overlap PCR mix in order to amplify the spliced gene product *phlAC\_OE* (20 cycles).

The PCR reaction mixture consisted of the following components:

|         |                                                |
|---------|------------------------------------------------|
| 50 µL   | overlap-PCR mix                                |
| 5.65 µL | H <sub>2</sub> O sterile                       |
| 4 µL    | Phusion GC buffer (5×                          |
| 4 µL    | primer forward (5 nmol µL <sup>-1</sup> )      |
| 4 µL    | primer reverse (5 nmol µL <sup>-1</sup> )      |
| 0.6 µL  | DMSO (3 vol%)                                  |
| 1.25 µL | dNTPs (0.2 nmol µL <sup>-1</sup> )             |
| 0.5 µL  | Phusion DNA polymerase (2 U µL <sup>-1</sup> ) |

The following PCR program was used:

|     |       |          |
|-----|-------|----------|
| 1×  | 98 °C | 0:30 min |
| 20× | 98 °C | 0:10 min |
|     | 60 °C | 0:20 min |
|     | 72 °C | 0:40 min |
| 1×  | 72 °C | 7:00 min |
|     | 4 °C  | ∞        |

The entire reaction mixture was loaded onto an agarose gel and the desired gene product *phlAC\*\_OE* (approx. 1986 bp) was gel-purified (Figure S7).

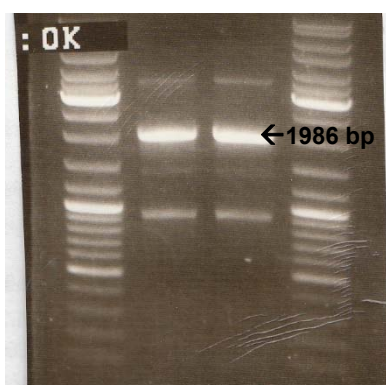

**Figure S7.** Different products obtained by OExPCR. The strong band (≈1986 bp) belongs to the desired gene product *phlAC\*\_OE*.

**Restriction and ligation.** The misassembled DNA stretch in pEG332\_C20 was removed by restriction digest (*EcoRI*). The remaining backbone pEG332\_C20 was recovered and gel-purified. Ligation with *phlAC\**\_OE finally established the correct *phlACB\** construct (pEG332).

The ligation consisted of the following components:

|        |                                    |
|--------|------------------------------------|
| 8.7 µL | insert (186 ng, <i>phlAC*</i> _OE) |
| 4 µL   | vector (100 ng, pEG332_C20)        |
| 4.3 µL | H <sub>2</sub> O sterile           |
| 2 µL   | ligation buffer (10×)              |
| 1 µL   | T4 ligase                          |

The reaction was incubated overnight at 4 °C. 5 µL of the ligation mix was transformed into *E. coli* DH5α and streaked onto LB plates containing 100 µg mL<sup>-1</sup> ampicillin for selection. Isolated plasmids of randomly picked clones were controlled by restriction digest and sequencing.

## 2.4. Cloning of *PpATaseCH* (pCAS1)

**Restriction and ligation.** Cloning of the codon-harmonized *phlACB\** construct from pEG332 into the T7-regulated pCAS1 expression vector was accomplished by restriction digest with *EcoRI* and *BamHI* (1 µg DNA). The fragments were gel-purified prior to ligation.

The triple ligation (1:1:1 ratio) consisted of the following components:

|        |                          |
|--------|--------------------------|
| 6.1 µL | insert 1 (30.3 ng)       |
| 4.6 µL | insert 2 (60.6 ng)       |
| 2.3 µL | vector (100 ng)          |
| 4 µL   | H <sub>2</sub> O sterile |
| 2 µL   | ligation buffer (10×)    |
| 1 µL   | T4 ligase                |

The reaction was incubated overnight at 4 °C. 5 µL of the ligation mix was transformed into *E. coli* DH5α and streaked onto LB plates containing 100 µg mL<sup>-1</sup> ampicillin for selection. Isolated plasmids of randomly picked clones were controlled by restriction digest and sequencing.

### 3. SDS-PAGE analysis

Cell-free extract was analyzed by SDS-PAGE (Figure S8)

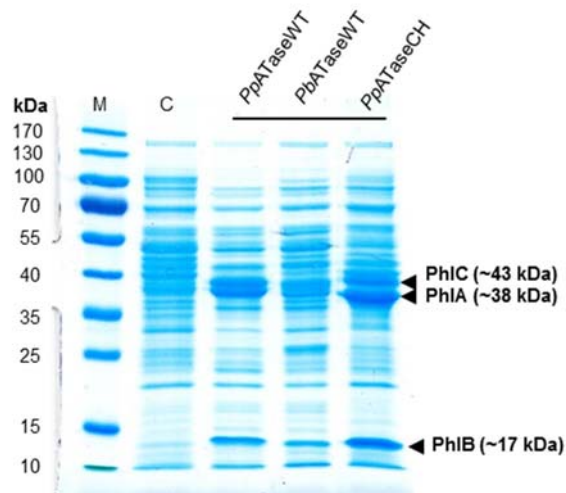

**Figure S8.** SDS-PAGE analysis of the cell-free *E. coli* extract containing the recombinant *PpATaseWT*, *PbATaseWT* or *PpATaseCH*. Empty *E. coli* BL21 (DE3) host cells served as positive control (C). The ATase encoding genes *phlA*, *phlC* and *phlB* of all ATases were overexpressed in soluble form.

### 4. Alternative ATase Preparations and Storage Types

**Lyophilized cells/KPi or PBS.** The harvested cells were washed and resuspended in KPi-buffer (50 mM, pH 7.5) or PBS-buffer (137 mM NaCl, 2.7 mM KCl, 10 mM Na<sub>2</sub>HPO<sub>4</sub>, 1.8 mM KH<sub>2</sub>PO<sub>4</sub>), shock-frozen in liquid nitrogen and lyophilized. The cells were stored at 4 °C (optional: inert storage under Ar) until further use for biotransformations.

**Lyophilized cell-free extract.** The harvested cells were suspended in buffer (7 mL buffer to 1 g wet cells; KPi-buffer, 50 mM, pH 7.5) and disrupted to obtain the cell-free extract. The cell-free extract was shock-frozen in liquid nitrogen, lyophilized and stored at 4 °C (optional: inert storage under Ar) until further use for biotransformations.

**Cell-free extract.** The harvested cells were suspended in buffer (7 mL buffer to 1 g wet cells; KPi-buffer, 50 mM, pH 7.5) and disrupted to obtain the cell-free extract. The cell-free extract was shock-frozen in liquid nitrogen and stored at 4 °C, -20 °C or -80 °C until further use for biotransformations.

**Culture media.** Protein expression was tested in different culture media: LB-, TB- and YENB-media.

**LB-media (1 L):** 10 g tryptone (Oxoid™), 7 g NaCl (Roth), 5 g yeast extract (Oxoid™), optional: 1 mM ZnCl<sub>2</sub>, fill up to 1 L with H<sub>2</sub>O, autoclave.

**TB-media (1 L):** 12 g tryptone (Oxoid™), 24 g yeast extract (Oxoid™), 4 mL glycerol, fill up to 900 mL with H<sub>2</sub>O, autoclave. Add 100 mL of a sterile solution of 0.17 M KH<sub>2</sub>PO<sub>4</sub>, 0.72 M K<sub>2</sub>HPO<sub>4</sub>.

**YENB-media (1 L):** 0.8% nutrient broth (Difco™), 0.75% Bacto yeast extract (Difco™), 12 N NaOH (adjust pH 7.5), fill up to 1 L with H<sub>2</sub>O, autoclave.

## 5. Modified procedure to test the impact of bivalent metals

The chloride salt of  $\text{Ca}^{2+}$ ,  $\text{Mg}^{2+}$ ,  $\text{Zn}^{2+}$ ,  $\text{Cu}^{2+}$ ,  $\text{Co}^{2+}$ ,  $\text{Mn}^{2+}$ ,  $\text{Sr}^{2+}$  or  $\text{Ni}^{2+}$  (5.0 or 8.0 mM final concentration) was added to the reaction mixture containing ATase and substrate (Figure S9).

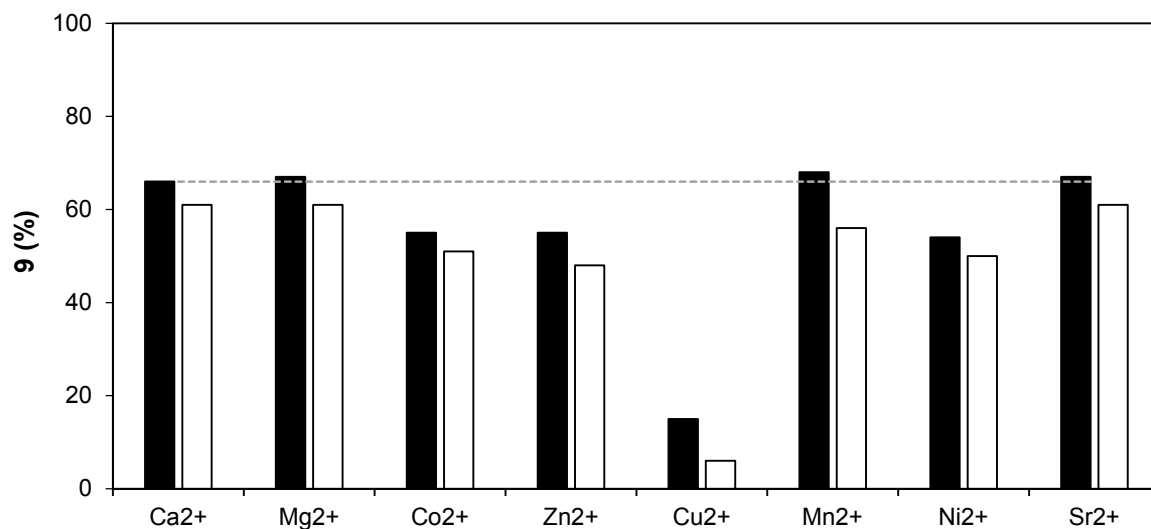

**Figure S9.** The influence of bivalent metals on the biocatalytic reaction catalyzed by *PpATaseCH*. Chloride salts were added to the reaction at different concentrations, *i.e.* 5.0 mM (black columns) or 8.0 mM (red columns). The control reaction was performed in the absence of metal salts (dashed grey line). Assay conditions: Lyophilized cell of *E. coli* extract containing the recombinant *PpATaseCH* (20 mg), HEPES-buffer (50 mM, pH 7.5), solution of  $\text{M}^{2+}$  (5.0 mM or 8.0 mM, prepared in HEPES-buffer using the corresponding metal chloride salt  $\text{MCl}_2$ ), resorcinol (**1b**, 10 mM), DAPG (15 mM), 35 °C, 30 minutes, 750 rpm.

The bioacetylation of **8** with DAPG was performed as described in the manuscript. The influence of various temperatures on expression visibility are shown in Figure S10.

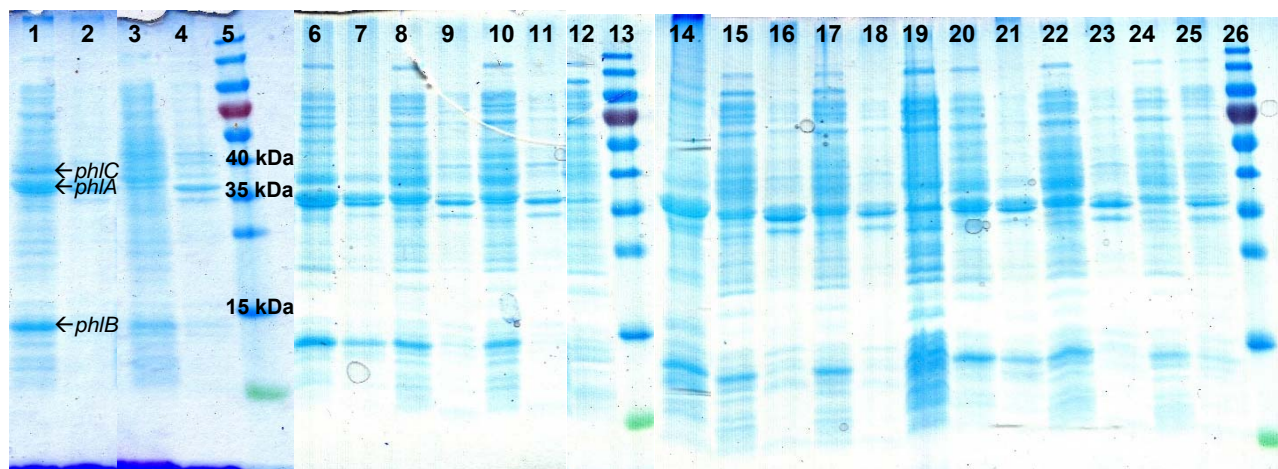

**Figure S10.** SDS-PAGE of the *PpATaseCH* and the *PpATaseCH* (pCAS1-construct) in comparison to the *PpATaseWT* after expression in the presence or absence of  $\text{ZnCl}_2$  (1 mM) for 21 h at different temperatures: *PpATaseCH* 30 °C,  $\text{Zn}^{2+}$ , supernatant (lane 1), pellet (lane 2); *PpATaseWT* 30 °C,  $\text{Zn}^{2+}$ , supernatant (lane 3),

pellet (lane 4); PageRuler Prestained Protein Ladder (lane 5, 13, 26); *PpATaseCH* 37 °C, Zn<sup>2+</sup>, supernatant (lane 6), pellet (lane 7); *PpATaseCH* 25 °C, Zn<sup>2+</sup>, supernatant (lane 8), pellet (lane 9); *PpATaseCH* 20 °C, Zn<sup>2+</sup>, supernatant (lane 10), pellet (lane 11); *PpATaseCH*-pCAS1 37 °C, Zn<sup>2+</sup>, supernatant (lane 12), pellet (lane 14); *PpATaseCH*-pCAS1 25 °C, Zn<sup>2+</sup>, supernatant (lane 15), pellet (lane 16); *PpATaseCH*-pCAS1 20 °C, Zn<sup>2+</sup>, supernatant (lane 17), pellet (lane 18); negative control, empty pASK-IBA3 vector (lane 19); *PpATaseCH* 37 °C, w/o Zn<sup>2+</sup>, supernatant (lane 20), pellet (lane 21); *PpATaseCH* 25 °C, w/o Zn<sup>2+</sup>, supernatant (lane 22), pellet (lane 23); *PpATaseCH* 20 °C, Zn<sup>2+</sup>, supernatant (lane 24), pellet (lane 25).

Different water-immiscible (toluene, cyclohexane), moderately water-miscible (MTBE, DIPE, Et<sub>2</sub>O, EtOAc), aprotic water-miscible (DMSO, DMF, THF, 1,4-dioxane, acetone, MeCN) and protic water-miscible (MeOH, EtOH, glycerol, ethylene glycol) solvents were tested for the bioacetylation of model substrate **8** either at 5 vol% (Figure S11, black columns) or 20 vol% (Figure S11, grey columns) and the compatibility with *PpATaseCH* was determined based on the formation of C-acetyl product **9**.

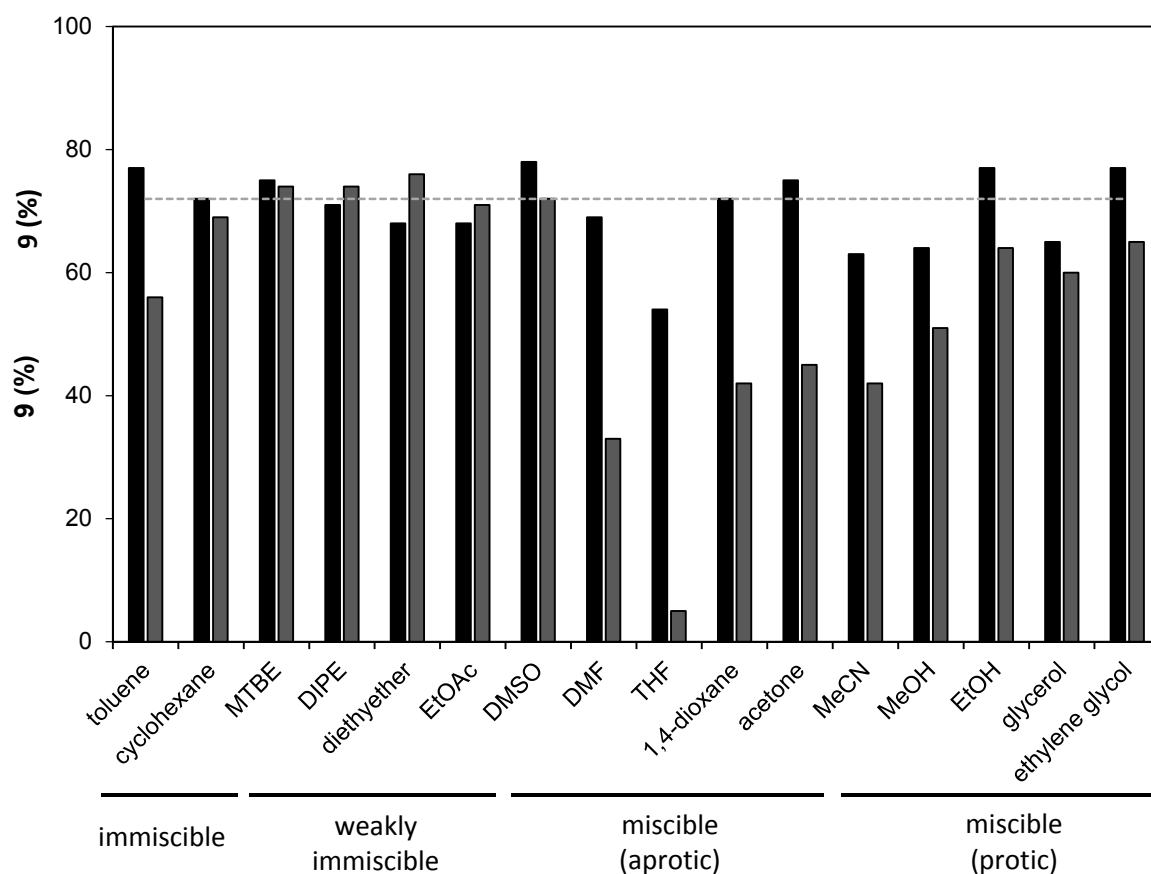

**Figure S11.** Co-solvent-study for the acetylation of **8** employing *PpATaseCH* at 5 vol% (black columns) or 20 vol% (grey columns) of solvent. Assay conditions: Cell-free *E. coli* extract containing the recombinant *PpATaseCH* (vol.  $\equiv$  to 20 mg lyophilisate), KPi-buffer (50 mM, pH 7.5), resorcinol (**8**, 10 mM), DAPG (15 mM), co-solvent (5 or 20 vol%), 35 °C, 30 minutes, 750 rpm.

## 6. Modified procedure to test the impact of inhibitors/additives

A small aliquot of cell-free *E. coli* extract containing the recombinant ATase (50  $\mu$ L) was pretreated with the respective inhibitor/additive for 40 minutes at 28  $^{\circ}$ C: dithiothreitol (DTT, 0.5 or 2 mM), 2-mercaptoethanol ( $\beta$ -Met, 1 or 2 mM), phenylmethanesulfonyl fluoride (PMSF, 1 mM), iodoacetic acid (IAA, 1 or 2 mM), p-chloromecuribenzoic acid (pCMB, 1 mM), diethylpyrocarbonate (DEPC, 2 or 3 mM), EDTA (5 mM), Triton-X100 (0.5 w/v%), Tween-40 (0.5 w/v%). The residual activity of the pretreated ATase was determined by performing the bioacylation of **8** with DAPG for 30 minutes at 35  $^{\circ}$ C as described in manuscript.

Additionally, the effect of phloroglucinol (PG, 10 mM), resorcinol (8, 10 mM), monoacetylphloroglucinol (MAPG, 15 mM), 2,4-dihydroxyphloroglucinol (DAPG, 15 mM) was examined. A solution containing the recombinant ATase (50  $\mu$ L), KPi-buffer (50 mM, pH 7.5, total volume: 0.5 mL), phloroglucinol (PG, final conc. 10 mM) or resorcinol (8, final conc. 10 mM) was incubated for 40 minutes at 28  $^{\circ}$ C. After this time, the bioacylation was started by addition of DAPG (1.58 mg, 0.0075 mmol, 15 mM final concentration) dissolved in DMSO (50  $\mu$ L). The final reaction mixture (0.5 mL, 10 vol% DMSO) was shaken for 30 min at 35  $^{\circ}$ C and 750 rpm in an Eppendorf benchtop shaker. The reaction was aborted by addition of HPLC-grade MeCN (0.45 mL) and vigorous shaking. The precipitated protein was removed by centrifugation (20 min, 14,000 rpm, 18,407  $\times$  g) and the supernatant (800  $\mu$ L) was directly subjected to HPLC for determination of conversions.

In the case of MAPG (final conc. 15 mM) or DAPG (final. Conc. 15 mM) after incubation with enzyme, the bioacylation was started by addition of resorcinol (8, 10 mM final conc.) dissolved in DMSO (50  $\mu$ L).

## 7. Synthesis of 2,4-diacetylphloroglucinol (DAPG, **5**)

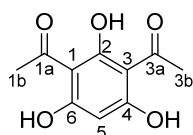

According to a literature procedure,[4] phloroglucinol (500 mg, 4.0 mmol) was dissolved in  $\text{BF}_3 \cdot 2\text{CH}_3\text{COOH}$  (2.5 mL, 18.0 mmol) and the resulting mixture was refluxed for 3 h. After cooling the mixture to room temperature, a solution of 0.5 M aqueous KOAc (50 mL) was added dropwise and stirring was continued for further 30 minutes. The crude precipitate was filtered and recrystallized from MeOH/ $\text{H}_2\text{O}$  (1:1) affording 2,4-diacetylphloroglucinol **5** as orange needle-shaped crystals (767 mg, 3.65 mmol, 91 %).  $R_F$  = 0.8 ( $\text{CHCl}_3/\text{MeOH}$ , 80:20), m.p 143-145  $^{\circ}$ C (173-174  $^{\circ}$ C). NMR data is in accordance with literature.[3]  $^1\text{H}$ -NMR (300 MHz,  $\text{DMSO}-d_6$ ):  $\delta$  [ppm] = 2.57 (s, 6 H, 1b-H, 3b-H), 5.85 (s, 1 H, 5-H), 13.19 (s, 2 H, Ar-OH), 16.27 (s, 1 H, Ar-OH).  $^{13}\text{C}$ -NMR (75 MHz,  $\text{DMSO}-d_6$ ):  $\delta_C$  [ppm] = 32.97 (C-1b), 95.05, 104.0, 169.1, 171.6 (4  $\times$  arom. C), 204.0 (C-1a). GC-MS ( $\text{EI}^+$ , 70 eV):  $m/z$  (%) = 210 [ $\text{M}^+$ ] (67), 195 [ $\text{C}_9\text{H}_8\text{O}_5^+$ ] (100), 177 [ $\text{C}_{10}\text{H}_9\text{O}_3^+$ ] (64).

## References

- [1] C. Notredame, D. G. Higgins, J. Heringa, *J. Mol. Biol.* **2000**, 302, 205-217.
- [2] X. Robert, P. Gouet, *Nucleic Acids Res.* **2014**, 42, W320-W324.
- [3] S. Sato, T. Kusakari, T. Suda, T. Kasai, T. Kumazawa, J.-i. Onodera, H. Obara, *Tetrahedron* **2005**, 61, 9630-9636.

- [4] A. V. Bryksin, I. Matsumura, *BioTechniques* **2010**, 48, 463-465.
- [5] D. G. Gibson, L. Young, R.-Y. Chuang, J. C. Venter, C. A. Hutchison, H. O. Smith, *Nat. Meth.* **2009**, 6, 343-345.
